# Supplementary material for: The gender suicide paradox under gender role reversal during industrialisation
Source: PLoS One. 2018 Aug 23;13(8):e0202487. doi: 10.1371/journal.pone.0202487 (PMC6107173; doi:10.1371/journal.pone.0202487)
Supplement: S1 Dataset — (XLSX) [file pone.0202487.s001.xlsx]

## Sheet: Sheet1
Gender	Period	Status
Female	Jan 1900	Attempted
Female	Oct 1870	Attempted
Female	1901-03-01	Attempted
Female	March 1880	Attempted
Female	April 1906	Attempted
Female	June1891	Attempted
Female	May 1891	Attempted
Female	1905-11-01	Attempted
Female	May 1890	Attempted
Female	1905-07-01	Attempted
Female	Dec 1880	Attempted
Female	May 1900	Attempted
Female	Oct 1852	Attempted
Female	July 1862	Attempted
Female	Jan 1863	Attempted
Female	March 1866	Attempted
Female	May 1912	Attempted
Female	June 1869	Attempted
Female	Dec 1869	Attempted
Female	March 1859	Attempted
Female	March 1870	Attempted
Female	March 1872	Attempted
Female	July 1874	Attempted
Female	1905-01-01	Attempted
Female	Aug 1866	Attempted
Female	April 1844	Attempted
Female	Aug 1855	Attempted
Female	May 1866	Attempted
Female	Nov 1867	Attempted
Female	Feb 1873	Attempted
Female	Feb 1881	Attempted
Female	July 1881	Attempted
Female	June 1885	Attempted
Female	Oct 1893	Attempted
Female	Feb 1915	Attempted
Female	June 1894	Attempted
Female	July 1896	Attempted
Female	1903-12-01	Attempted
Female	1904-12-01	Attempted
Female	Dec 1881	Attempted
Female	Sept 1885	Attempted
Female	1901-06-01	Attempted
Female	June 1851	Attempted
Female	June 1867	Attempted
Female	June 1909	Attempted
Female	Oct 1864	Attempted
Female	Oct 1862	Attempted
Female	Dec 1865	Attempted
Female	Dec 1881	Attempted
Female	June 1848	Attempted
Female	Aug 1867	Attempted
Female	Dec 1855	Attempted
Female	Oct 1911	Attempted
Female	1905-01-01	Attempted
Female	July 1845	Attempted
Female	April 1852	Attempted
Female	June 1863	Attempted
Female	Feb 1867	Attempted
Female	Dec 1870	Attempted
Female	April 1855	Attempted
Female	April 1862	Attempted
Female	March 1864	Attempted
Female	Jan 1918	Attempted
Female	June 1867	Attempted
Female	Dec 1864	Attempted
Female	June 1875	Attempted
Female	Aug 1855	Attempted
Female	Aug 1858	Attempted
Female	Oct 1858	Attempted
Female	May 1859	Attempted
Female	Oct 1859	Attempted
Female	Aug 1861	Attempted
Female	Oct 1861	Attempted
Female	Oct 1861	Attempted
Female	Aug 1862	Attempted
Female	Jan 1863	Attempted
Female	April 1865	Attempted
Female	July 1865	Attempted
Female	Sept 1865	Attempted
Female	May 1866	Attempted
Female	Jan 1867	Attempted
Female	June 1867	Attempted
Female	Sept 1867	Attempted
Female	Sept 1867	Attempted
Female	Jan 1868	Attempted
Female	Jan 1868	Attempted
Female	April 1868	Attempted
Female	April 1869	Attempted
Female	Aug 1869	Attempted
Female	July 1870	Attempted
Female	Sept 1872	Attempted
Female	April 1873	Attempted
Female	May 1873	Attempted
Female	July 1873	Attempted
Female	Aug 1873	Attempted
Female	Aug 1873	Attempted
Female	Sept 1873	Attempted
Female	Dec 1873	Attempted
Female	April 1874	Attempted
Female	Aug 1875	Attempted
Female	Oct 1879	Attempted
Female	May 1881	Attempted
Female	Mar 1882	Attempted
Female	Mar 1882	Attempted
Female	May 1882	Attempted
Female	Aug 1885	Attempted
Female	July 1887	Attempted
Female	Oct 1888	Attempted
Female	Feb 1891	Attempted
Female	Aug 1891	Attempted
Female	April 1892	Attempted
Female	June 1895	Attempted
Female	Sept 1897	Attempted
Female	April 1898	Attempted
Female	Sept 1898	Attempted
Female	June 1899	Attempted
Female	July 1899	Attempted
Female	April 1900	Attempted
Female	1901-01-01	Attempted
Female	1901-10-01	Attempted
Female	1902-04-01	Attempted
Female	1902-06-01	Attempted
Female	1902-10-01	Attempted
Female	1904-04-01	Attempted
Female	Aug 1907	Attempted
Female	Sept 1908	Attempted
Female	June 1914	Attempted
Female	Nov 1878	Attempted
Female	1903-06-01	Attempted
Female	1903-08-01	Attempted
Female	1903-08-01	Attempted
Female	June 1897	Attempted
Female	June 1909	Attempted
Female	Feb 1881	Attempted
Female	Feb 1847	Attempted
Female	July 1870	Attempted
Female	Dec 1845	Attempted
Female	July 1887	Attempted
Female	April 1896	Attempted
Female	June 1913	Attempted
Female	May 1881	Attempted
Female	Jan 1896	completed
Female	March 1890	completed
Female	Jan 1844	Completed
Female	June 1856	Completed
Female	March 1851	Completed
Female	June 1889	completed
Female	Sept 1876	Completed
Female	Nov 1881	completed
Female	June 1884	completed
Female	Feb 1886	completed
Female	Sept 1899	completed
Female	1905-08-01	completed
Female	Nov 1887	completed
Female	Feb 1844	Completed
Female	June 1887	completed
Female	July 1869	Completed
Female	June 1869	Completed
Female	Aug 1907	Completed
Female	1902-10-01	completed
Female	May 1879	completed
Female	Dec 1918	Completed
Female	1903-11-01	completed
Female	Dec 1876	Completed
Female	Jan 1876	Completed
Female	March 1852	Completed
Female	March 1856	Completed
Female	June 1844	Completed
Female	Sept 1870	Completed
Female	April 1884	completed
Female	June 1885	completed
Female	April 1852	Completed
Female	April 1893	completed
Female	Oct 1897	completed
Female	Feb 1898	completed
Female	July 1898	completed
Female	Dec 1885	completed
Female	July 1897	completed
Female	June 1862	Completed
Female	Jan 1867	Completed
Female	Aug 1869	Completed
Female	May 1880	completed
Female	June 1885	completed
Female	Feb 1889	completed
Female	March 1859	Completed
Female	Jan 1895	completed
Female	Mar 1886	completed
Female	June 1889	completed
Female	Dec 1889	completed
Female	1902-05-01	completed
Female	1902-03-01	completed
Female	May 1867	Completed
Female	Oct 1867	Completed
Female	Feb 1856	Completed
Female	1904-06-01	completed
Female	Feb 1851	Completed
Female	July 1873	Completed
Female	Nov 1908	Completed
Female	Dec 1884	completed
Female	Mar 1883	completed
Female	June 1911	Completed
Female	July 1845	Completed
Female	Aug 1907	Completed
Female	March 1857	Completed
Female	Aug 1894	completed
Female	Sept 1854	Completed
Female	April 1845	Completed
Female	Sept 1848	Completed
Female	March 1852	Completed
Female	Sept 1853	Completed
Female	April 1855	Completed
Female	Feb 1856	Completed
Female	Sept 1857	Completed
Female	July 1858	Completed
Female	July 1861	Completed
Female	Oct 1861	Completed
Female	Feb 1862	Completed
Female	Nov 1866	Completed
Female	June 1867	Completed
Female	Sept 1869	Completed
Female	Oct 1869	Completed
Female	March 1873	Completed
Female	July 1873	Completed
Female	Aug 1873	Completed
Female	Oct 1873	Completed
Female	July 1874	Completed
Female	July 1875	Completed
Female	Mar 1883	completed
Female	Nov 1883	completed
Female	Mar 1885	completed
Female	Mar 1885	completed
Female	Dec 1889	completed
Female	May 1890	completed
Female	May 1891	completed
Female	Mar 1892	completed
Female	April 1892	completed
Female	May 1894	completed
Female	Dec 1894	completed
Female	Sept 1895	completed
Female	1900-05-01	completed
Female	1901-02-01	completed
Female	1903-11-01	completed
Female	1904-06-01	completed
Female	1905-05-01	completed
Female	Aug 1906	Completed
Female	Dec 1909	Completed
Female	June 1911	Completed
Female	Sept 1911	Completed
Female	Dec 1912	Completed
Female	1903-05-01	completed
Female	Feb 1847	Completed
Female	June1891	completed
Female	June 1867	Completed
Female	Nov 1868	Completed
Female	June 1875	Completed
Female	May 1866	Completed
Female	Aug 1895	completed
Female	Jan 1856	Completed
Female	Jan 1878	completed
Female	April 1890	completed
Female	April 1894	completed
Female	May 1895	completed
Female	Dec 1895	completed
Female	Aug 1896	completed
Female	April 1908	Completed
Female	May 1898	completed
Female	1901-03-01	Attempted
Female	July 1884	Attempted
Female	June 1896	Attempted
Female	April 1892	Attempted
Female	1902-01-01	Attempted
Female	Jan 1882	Attempted
Female	May 1876	Completed
Female	May 1878	completed
Male	1904-07-01	Attempted
Male	July 1873	Attempted
Male	1904-07-01	Attempted
Male	October 1922	Attempted
Male	May 1900	Attempted
Male	Aug 1863	Attempted
Male	July 1899	Attempted
Male	Aug 1891	Attempted
Male	June 1894	Attempted
Male	October 1912	Attempted
Male	April 1887	Attempted
Male	1901-04-01	Attempted
Male	April 1922	Attempted
Male	May 1875	Attempted
Male	Jan 1873	Attempted
Male	Jan 1894	Attempted
Male	Feb 1909	Attempted
Male	May 1870	Attempted
Male	March 1914	Attempted
Male	Oct 1872	Attempted
Male	Sept 1906	Attempted
Male	June 1869	Attempted
Male	1901-01-01	Attempted
Male	March 1865	Attempted
Male	July 1886	Attempted
Male	1901-11-01	Attempted
Male	Dec 1873	Attempted
Male	March 1908	Attempted
Male	June 1867	Attempted
Male	Feb 1880	Attempted
Male	Aug 1878	Attempted
Male	March 1889	Attempted
Male	May 1854	Attempted
Male	Nov 1865	Attempted
Male	Nov 1885	Attempted
Male	May 1879	Attempted
Male	Aug 1862	Attempted
Male	Feb 1899	Attempted
Male	1903-08-01	Attempted
Male	Sept 1911	Attempted
Male	July 1889	Attempted
Male	June 1864	Attempted
Male	May 1851	Attempted
Male	Aug 1909	Attempted
Male	Oct 1911	Attempted
Male	March 1913	Attempted
Male	1903-05-01	Attempted
Male	March 1880	Attempted
Male	1901-08-01	Attempted
Male	Aug 1885	Attempted
Male	1902-03-01	Attempted
Male	Sept 1868	Attempted
Male	April 1875	Attempted
Male	1902-02-01	Attempted
Male	April 1880	Attempted
Male	March 1897	Attempted
Male	1903-12-01	Attempted
Male	May 1851	Attempted
Male	October 1933	Attempted
Male	Feb 1863	Attempted
Male	April 1864	Attempted
Male	Sept 1868	Attempted
Male	July 1886	Attempted
Male	Oct 1889	Attempted
Male	1900-09-01	Attempted
Male	1901-01-01	Attempted
Male	1904-05-01	Attempted
Male	Jan 1873	Attempted
Male	July 1908	Attempted
Male	Mar 1893	Attempted
Male	May 1893	Attempted
Male	1904-11-01	Attempted
Male	1901-08-01	Attempted
Male	Feb 1869	Attempted
Male	May 1875	Attempted
Male	Feb 1907	Attempted
Male	Jan 1866	Attempted
Male	Sept 1885	Attempted
Male	Jan 1870	Attempted
Male	July 1870	Attempted
Male	Oct 1854	Attempted
Male	1902-12-01	Attempted
Male	Aug 1885	Attempted
Male	Nov 1889	Attempted
Male	1904-07-01	Attempted
Male	May 1899	Attempted
Male	June 1882	Attempted
Male	June 1879	Attempted
Male	Feb 1891	Attempted
Male	May 1844	Attempted
Male	March 1855	Attempted
Male	Jan 1852	Attempted
Male	1903-07-01	Attempted
Male	June 1908	Attempted
Male	1902-08-01	Attempted
Male	May 1875	Attempted
Male	Jan 1868	Attempted
Male	April 1891	Attempted
Male	Dec 1880	Attempted
Male	May 1865	Attempted
Male	June 1899	Attempted
Male	1901-04-01	Attempted
Male	Dec 1894	Attempted
Male	Nov 1859	Attempted
Male	1902-12-01	Attempted
Male	Feb 1943	Attempted
Male	June 1898	Attempted
Male	Feb 1851	Attempted
Male	Aug 1887	Attempted
Male	Nov 1875	Attempted
Male	Sept 1890	Attempted
Male	June 1897	Attempted
Male	March 1889	Attempted
Male	Jan 1895	Attempted
Male	1904-02-01	Attempted
Male	Jan 1894	Attempted
Male	June 1911	Attempted
Male	June 1867	Attempted
Male	July 1867	Attempted
Male	May 1868	Attempted
Male	Oct 1888	Attempted
Male	1902-01-01	Attempted
Male	1901-03-01	Attempted
Male	1901-01-01	Attempted
Male	May 1868	Attempted
Male	May 1868	Attempted
Male	Aug 1875	Attempted
Male	Nov 1889	Attempted
Male	Jan 1914	Attempted
Male	1904-12-01	Attempted
Male	1903-03-01	Attempted
Male	Sept 1846	Attempted
Male	Oct 1857	Attempted
Male	Feb 1867	Attempted
Male	June 1867	Attempted
Male	Sept 1869	Attempted
Male	April 1870	Attempted
Male	May 1870	Attempted
Male	May 1870	Attempted
Male	Oct 1872	Attempted
Male	June 1873	Attempted
Male	May 1879	Attempted
Male	Oct 1894	Attempted
Male	April 1899	Attempted
Male	1901-06-01	Attempted
Male	1901-07-01	Attempted
Male	1902-11-01	Attempted
Male	1903-08-01	Attempted
Male	July 1906	Attempted
Male	June 1867	Attempted
Male	Oct 1849	Attempted
Male	Aug 1890	Attempted
Male	Jan 1862	Attempted
Male	Feb 1866	Attempted
Male	Oct 1856	Attempted
Male	July 1863	Attempted
Male	May 1880	Attempted
Male	Aug 1885	Attempted
Male	Oct 1878	completed
Male	Feb 1895	completed
Male	June 1894	completed
Male	March 1906	Completed
Male	Oct 1880	completed
Male	1904-03-01	completed
Male	May 1911	Completed
Male	June 1878	completed
Male	Feb 1867	Completed
Male	July 1896	completed
Male	Nov 1881	completed
Male	July 1914	Completed
Male	Jan 1898	completed
Male	May 1852	Completed
Male	Oct 1909	Completed
Male	June1891	completed
Male	Nov 1899	completed
Male	1902-11-01	completed
Male	Oct 1888	completed
Male	Mar 1884	completed
Male	June 1898	completed
Male	Sept 1884	completed
Male	Jan 1908	Completed
Male	January 1915	Completed
Male	April 1892	completed
Male	Nov 1852	Completed
Male	1902-01-01	completed
Male	1902-06-01	completed
Male	Nov 1892	completed
Male	Oct 1859	Completed
Male	June 1892	completed
Male	June 1909	Completed
Male	1905-05-01	completed
Male	April 1899	completed
Male	Jan 1895	completed
Male	Aug 1870	Completed
Male	Jan 1885	completed
Male	April 1868	Completed
Male	Dec 1908	Completed
Male	May 1856	Completed
Male	Sept 1910	Completed
Male	June 1907	Completed
Male	July 1906	Completed
Male	July 1907	Completed
Male	1905-11-01	completed
Male	1901-07-01	completed
Male	Nov 1895	completed
Male	Aug 1896	completed
Male	Aug 1864	Completed
Male	Jan 1898	completed
Male	1903-06-01	completed
Male	Oct 1873	Completed
Male	July 1849	Completed
Male	April 1870	Completed
Male	Dec 1858	Completed
Male	May 1875	Completed
Male	Aug 1870	Completed
Male	Feb 1908	Completed
Male	May 1898	completed
Male	Aug 1849	Completed
Male	Oct 1883	completed
Male	Feb 1879	completed
Male	Dec 1858	Completed
Male	Nov 1888	completed
Male	Feb 1897	completed
Male	Mar 1894	completed
Male	July 1873	Completed
Male	Feb 1913	Completed
Male	Dec 1854	Completed
Male	May 1844	Completed
Male	Mar 1877	completed
Male	Aug 1891	completed
Male	Feb 1908	Completed
Male	Jan 1895	completed
Male	April 1887	completed
Male	Sept 1896	completed
Male	Oct 1909	Completed
Male	May 1893	completed
Male	Aug 1865	Completed
Male	July 1875	Completed
Male	May 1912	Completed
Male	Oct 1854	Completed
Male	June 1885	completed
Male	Sept 1893	completed
Male	Oct 1896	completed
Male	Sept 1907	Completed
Male	Aug 1910	Completed
Male	May 1913	Completed
Male	March 1908	Completed
Male	Sept 1909	Completed
Male	1904-06-01	completed
Male	Sept 1874	Completed
Male	Sept 1846	Completed
Male	1902-02-01	completed
Male	April 1869	Completed
Male	Sept 1854	Completed
Male	Aug 1896	completed
Male	Dec 1850	Completed
Male	May 1895	completed
Male	June 1888	completed
Male	Feb 1877	Completed
Male	June 1879	completed
Male	June 1899	completed
Male	Nov 1865	Completed
Male	August 1914	Completed
Male	May 1912	Completed
Male	Dec 1892	completed
Male	May 1886	completed
Male	May 1909	Completed
Male	Oct 1891	completed
Male	Nov 1872	Completed
Male	Mar 1893	completed
Male	1904-01-01	completed
Male	Jan 1894	completed
Male	June 1859	Completed
Male	1903-05-01	completed
Male	July 1870	Completed
Male	May 1899	completed
Male	Aug 1874	Completed
Male	July 1891	completed
Male	October 1912	Completed
Male	Sept 1893	completed
Male	June 1878	completed
Male	Aug 1877	completed
Male	Sept 1892	completed
Male	Sept 1894	completed
Male	June 1879	completed
Male	Sept 1880	completed
Male	Mar 1881	completed
Male	1905-11-01	completed
Male	Aug 1881	completed
Male	1905-05-01	completed
Male	April 1906	Completed
Male	Nov 1915	Completed
Male	Feb 1889	completed
Male	June 1899	completed
Male	October 1876	Completed
Male	1900-10-01	completed
Male	March 1887	completed
Male	Aug 1861	Completed
Male	May 1865	Completed
Male	April 1884	completed
Male	June 1863	Completed
Male	Oct 1907	Completed
Male	Jan 1889	completed
Male	Dec 1908	Completed
Male	July 1857	Completed
Male	July 1894	completed
Male	Jan 1910	Completed
Male	Sept 1894	completed
Male	Oct 1850	Completed
Male	1905-01-01	completed
Male	Oct 1867	Completed
Male	May 1881	completed
Male	July 1873	Completed
Male	March 1866	Completed
Male	Sept 1870	Completed
Male	April 1844	Completed
Male	Aug 1849	Completed
Male	July 1880	completed
Male	May 1888	completed
Male	Oct 1890	completed
Male	1900-10-01	completed
Male	Aug 1898	completed
Male	Sept 1862	Completed
Male	Sept 1898	completed
Male	April 1899	completed
Male	Aug 1911	Completed
Male	Dec 1845	Completed
Male	June 1864	Completed
Male	Aug 1875	Completed
Male	May 1900	completed
Male	May 1865	Completed
Male	1901-12-01	completed
Male	Sept 1913	Completed
Male	Oct 1867	Completed
Male	Jan 1893	completed
Male	July 1845	Completed
Male	Jan 1846	Completed
Male	Aug 1846	Completed
Male	Feb 1852	Completed
Male	Feb 1854	Completed
Male	Jan 1857	Completed
Male	Feb 1859	Completed
Male	Nov 1861	Completed
Male	Sept 1862	Completed
Male	April 1864	Completed
Male	Feb 1872	Completed
Male	Jan 1875	Completed
Male	July 1879	completed
Male	Feb 1882	completed
Male	Aug 1883	completed
Male	May 1886	completed
Male	June 1887	completed
Male	May 1889	completed
Male	May 1893	completed
Male	April 1899	completed
Male	Aug 1899	completed
Male	1903-03-01	completed
Male	1903-07-01	completed
Male	1903-09-01	completed
Male	1905-07-01	completed
Male	July 1885	completed
Male	Jan 1897	completed
Male	Dec 1870	Completed
Male	Sept 1844	Completed
Male	Oct 1852	Completed
Male	Jan 1857	Completed
Male	Jan 1859	Completed
Male	April 1847	Completed
Male	April 1884	completed
Male	Feb 1898	completed
Male	May 1869	Completed
Male	July 1876	Completed
Male	Aug 1876	Completed
Male	July 1879	completed
Male	March 1855	Completed
Male	May 1844	Completed
Male	Aug 1849	Completed
Male	Feb 1862	Completed
Male	April 1862	Completed
Male	July 1866	Completed
Male	Feb 1919	Completed
Male	May 1908	Completed
Male	1904-02-01	completed
Male	March 1911	Completed
Male	1905-01-01	completed
Male	Aug 1877	completed
Male	1903-10-01	Attempted
Male	Sept 1893	Attempted
Male	Feb 1894	Attempted
Male	March 1879	Attempted
Male	Feb 1877	Attempted
Male	Dec 1895	Attempted
Male	1903-12-01	Attempted
Male	April 1879	Attempted
Male	May 1893	Attempted
Male	Dec 1884	Attempted
Male	April 1896	Attempted
Male	1903-04-01	Attempted
Male	Feb 1888	Attempted
Male	Oct 1910	Attempted
Male	July 1906	Attempted
Male	June 1877	Attempted
Male	1904-01-01	Attempted
Male	1903-02-01	Attempted
Male	1903-02-01	Attempted
Male	May 1885	Attempted
Male	1904-05-01	completed
Male	Jan 1900	completed
Male	Oct 1892	completed
Male	Aug 1888	completed
Male	Feb 1892	completed
Male	March 1897	completed
Male	May 1877	completed
Male	Oct 1889	completed
Male	1902-10-01	completed
Male	Oct 1910	Completed
Male	Oct 1907	Completed
Male	May 1887	completed
Male	April 1897	completed
Male	Aug 1876	Completed
Male	April 1890	completed
Male	Apr 1877	completed
Male	Feb 1900	completed
Male	May 1898	completed
Male	July 1907	Completed
Male	Jan 1913	Completed
Male	May 1881	completed
Male	Sept 1876	Completed
